# Supplementary material
Source: ML conference proceedings conference paper supplement (https://aclanthology.org/2022.acl-long.490)
Supplement: software [file transition.xlsx]

## Sheet: BIO1
from_tag	to_tag	legal	end_of_chunk	start_of_chunk
B	B	TRUE	TRUE	TRUE
I	B	TRUE	TRUE	TRUE
O	B	FALSE	FALSE	TRUE
B	I	TRUE	FALSE	FALSE
I	I	TRUE	FALSE	FALSE
O	I	TRUE	FALSE	TRUE
B	O	TRUE	TRUE	FALSE
I	O	TRUE	TRUE	FALSE
O	O	TRUE	FALSE	FALSE

## Sheet: BIO2
from_tag	to_tag	legal	end_of_chunk	start_of_chunk	pre_create_entity	update_start	update_end	create_types	append_types	post_create_entity	leave_tag
B	B	TRUE	TRUE	TRUE	TRUE	TRUE	TRUE	TRUE	FALSE	FALSE	B
I	B	TRUE	TRUE	TRUE	TRUE	TRUE	TRUE	TRUE	FALSE	FALSE	B
O	B	TRUE	FALSE	TRUE	FALSE	TRUE	TRUE	TRUE	FALSE	FALSE	B
B	I	TRUE	FALSE	FALSE	FALSE	FALSE	TRUE	FALSE	TRUE	FALSE	I
I	I	TRUE	FALSE	FALSE	FALSE	FALSE	TRUE	FALSE	TRUE	FALSE	I
O	I	FALSE	FALSE	TRUE	FALSE	TRUE	TRUE	TRUE	FALSE	FALSE	B
B	O	TRUE	TRUE	FALSE	TRUE	FALSE	FALSE	FALSE	FALSE	FALSE	O
I	O	TRUE	TRUE	FALSE	TRUE	FALSE	FALSE	FALSE	FALSE	FALSE	O
O	O	TRUE	FALSE	FALSE	FALSE	FALSE	FALSE	FALSE	FALSE	FALSE	O

## Sheet: BIOES
from_tag	to_tag	legal	end_of_chunk	start_of_chunk	pre_create_entity	update_start	update_end	create_types	append_types	post_create_entity	leave_tag
B	B	FALSE	TRUE	TRUE	TRUE	TRUE	TRUE	TRUE	FALSE	FALSE	B
I	B	FALSE	TRUE	TRUE	TRUE	TRUE	TRUE	TRUE	FALSE	FALSE	B
O	B	TRUE	FALSE	TRUE	FALSE	TRUE	TRUE	TRUE	FALSE	FALSE	B
E	B	TRUE	TRUE	TRUE	TRUE	TRUE	TRUE	TRUE	FALSE	FALSE	B
S	B	TRUE	TRUE	TRUE	TRUE	TRUE	TRUE	TRUE	FALSE	FALSE	B
B	I	TRUE	FALSE	FALSE	FALSE	FALSE	TRUE	FALSE	TRUE	FALSE	I
I	I	TRUE	FALSE	FALSE	FALSE	FALSE	TRUE	FALSE	TRUE	FALSE	I
O	I	FALSE	FALSE	TRUE	FALSE	TRUE	TRUE	TRUE	FALSE	FALSE	B
E	I	FALSE	TRUE	TRUE	TRUE	TRUE	TRUE	TRUE	FALSE	FALSE	B
S	I	FALSE	TRUE	TRUE	TRUE	TRUE	TRUE	TRUE	FALSE	FALSE	B
B	O	FALSE	TRUE	FALSE	TRUE	FALSE	FALSE	FALSE	FALSE	FALSE	O
I	O	FALSE	TRUE	FALSE	TRUE	FALSE	FALSE	FALSE	FALSE	FALSE	O
O	O	TRUE	FALSE	FALSE	FALSE	FALSE	FALSE	FALSE	FALSE	FALSE	O
E	O	TRUE	TRUE	FALSE	TRUE	FALSE	FALSE	FALSE	FALSE	FALSE	O
S	O	TRUE	TRUE	FALSE	TRUE	FALSE	FALSE	FALSE	FALSE	FALSE	O
B	E	TRUE	FALSE	FALSE	FALSE	FALSE	TRUE	FALSE	TRUE	FALSE	E
I	E	TRUE	FALSE	FALSE	FALSE	FALSE	TRUE	FALSE	TRUE	FALSE	E
O	E	FALSE	FALSE	TRUE	FALSE	TRUE	TRUE	TRUE	FALSE	FALSE	S
E	E	FALSE	TRUE	TRUE	TRUE	TRUE	TRUE	TRUE	FALSE	FALSE	S
S	E	FALSE	TRUE	TRUE	TRUE	TRUE	TRUE	TRUE	FALSE	FALSE	S
B	S	FALSE	TRUE	TRUE	TRUE	TRUE	TRUE	TRUE	FALSE	FALSE	S
I	S	FALSE	TRUE	TRUE	TRUE	TRUE	TRUE	TRUE	FALSE	FALSE	S
O	S	TRUE	FALSE	TRUE	FALSE	TRUE	TRUE	TRUE	FALSE	FALSE	S
E	S	TRUE	TRUE	TRUE	TRUE	TRUE	TRUE	TRUE	FALSE	FALSE	S
S	S	TRUE	TRUE	TRUE	TRUE	TRUE	TRUE	TRUE	FALSE	FALSE	S

## Sheet: OntoNotes
from_tag	to_tag	legal	end_of_chunk	start_of_chunk
(*	(*	FALSE	TRUE	TRUE
*)	(*	TRUE	TRUE	TRUE
()	(*	TRUE	TRUE	TRUE
*	(*	TRUE	FALSE	TRUE
(*	*)	TRUE	FALSE	FALSE
*)	*)	FALSE	TRUE	TRUE
()	*)	FALSE	TRUE	TRUE
*	*)	TRUE	FALSE	FALSE
(*	()	FALSE	TRUE	TRUE
*)	()	TRUE	TRUE	TRUE
()	()	TRUE	TRUE	TRUE
*	()	TRUE	FALSE	TRUE
(*	*	TRUE	FALSE	FALSE
*)	*	TRUE	TRUE	FALSE
()	*	TRUE	TRUE	FALSE
*	*	TRUE	FALSE	FALSE
